# Supplementary material for: Bright spots and actionable insights for urban governance of the climate–biodiversity–health nexus
Source: Research Square preprint supplement (doi:10.21203/rs.3.rs-6944613/v1), 2025-07-03
Supplement: Supplementary file 1 [file e8e036e0bf3a544404782654.docx]

## **Table 1. City Documents Analyzed in the Nexus Database**

| **City / Region** | **Document Title** | **Institution / Author** | **Link** |
| --- | --- | --- | --- |
| **Cork** | Climate Action Charter 2019 | Cork City Council (2019) | https://publications.corkcity.ie/view/768004668/ |
| **Cork** | Climate Change Adaptation Strategy 2019-2024 | Cork City Council (2019) | https://www.corkcoco.ie/sites/default/files/2021-11/cork-county-council-climate-adaptation-strategy-2019-2024-pdf.pdf |
| **Cork** | Cork 2050: realizing the full potential | Cork County Council and Cork City Council (2017) | https://www.corkcoco.ie/sites/default/files/2022-03/cork-2050-executive-summary-pdf.pdf |
| **Cork** | Cork City Climate Action Plan 2024–2029 | Cork City Council (2023) | https://publications.corkcity.ie/view/90275165/ |
| **Cork** | Cork City Development Plan (2022–2028) | Cork City Council (2022) | https://publications.corkcity.ie/view/935101702/ |
| **Cork** | Cork Metropolitan Area Transport Strategy 2040 | Cork City Council (2020) | https://www.nationaltransport.ie/wp-content/uploads/2021/06/Cork-Metropolitan-Area-Transport-Strategy-CMATS-2040.pdf |
| **Cork** | Heritage and Biodiversity Plan 2021-2026 | Cork City Council (2020) | https://www.corkcity.ie/media/yezpuryv/heritage-biodiversity-plan-2021-2026.pdf |
| **Klagenfurt** | Mobilitätskonzept Klagenfurt 2035 mit Schwerpunkt ÖPNV | Traffix Verkehrsplanung GmbH (2019) | https://www.klagenfurt.at/stadtservice/mobilitaet-parken/mobilitaetskonzept-klagenfurt-2035 |
| **Klagenfurt** | Leitbild Klagenfurt am Wörthersee 2022 | Magistrat der Landeshauptstadt Klagenfurt am Wörthersee (2022) | https://www.klagenfurt.at/fileadmin/user_upload/Stadt_Klagenfurt/03-StadtINFOS/Leitbild/Leitbild_2022_Klein.pdf |
| **Klagenfurt** | Smart City Climate Strategy Klagenfurt am Wörthersee | Magistrat der Landeshauptstadt Klagenfurt am Wörthersee (2023) | https://www.klagenfurt.at/fileadmin/user_upload/Stadt_Klagenfurt/01-StadtSERVICE/Klima-Umwelt/Smart_City_Strategie/Smart_City_Klimastrategie_Version_7.1.pdf |
| **Klagenfurt** | Smart City Climate Strategy Klagenfurt on Wörthersee - Anhang | Magistrat der Landeshauptstadt Klagenfurt am Wörthersee (2023) | https://www.klagenfurt.at/fileadmin/user_upload/Stadt_Klagenfurt/01-StadtSERVICE/Klima-Umwelt/Smart_City_Strategie/Anhang_Smart_City_Klimastrategie_Version_7.1.pdf |
| **Klagenfurt** | 4. Monitoringbericht: Smart City Klimastrategie 7.0 | Magistrat der Landeshauptstadt Klagenfurt am Wörthersee (2023) | https://www.klagenfurt.at/fileadmin/user_upload/Stadt_Klagenfurt/01-StadtSERVICE/Klima-Umwelt/Smart_City_Strategie/5.Monitoringbericht_Smart_City_Klimastrategie.pdf |
| **Klagenfurt** | Stadtentwicklungskonzept Klagenfurt - Stadtentwicklungsstrategie 2035 | Magistrat der Landeshauptstadt Klagenfurt am Wörthersee (2023) | https://www.klagenfurt.at/fileadmin/user_upload/Stadt_Klagenfurt/02-StadtVERWALTUNG/Stadtentwicklung/Stadtentwicklungskonzept_2025_/STEK_Strategie_2023_11_22.pdf |
| **Klagenfurt** | Masterplan Radfahren Klagenfurt | Amt der Kärtner Landesregierung & Magistrat der Landeshauptstadt Klagenfurt (2021) | https://www.klagenfurt.at/stadtservice/mobilitaet-parken/mobilitaetskonzept-klagenfurt-2035 |
| **Klagenfurt** | Climate City Contract 2030 Climate Neutrality Action Plan | Klagenfurt & Net Zero Cities | https://netzerocities.app/resource-4062 |
| **Päijät-Häme** | Päijät-Hämeen vihreän siirtymän ohjelma | Päijät-Häme county | https://paijat-hame.fi/wp-content/uploads/2024/04/Vihrean_siirtyman_ohjelma_web29042024.pdf |
| **Päijät-Häme** | Carbon Neutral Päijät-Häme 2030: Climate Action Roadmap | Päijät-Häme county | https://paijat-hame.fi/wp-content/uploads/2022/03/Climate_Action_Roadmap_english-update.pdf |
| **Päijät-Häme** | Lahden ilmasto-ohjelma 2023-2030 | City of Lahti | https://www.lahti.fi/uploads/2023/06/f6892f41-lahden-ilmasto-ohjelma-2023.pdf |
| **Päijät-Häme** | Nature Step to Health: Lahti Regional Health and Environment Programme 2022‒2032 | Päijät-Häme county | https://paijatha.fi/wp-content/uploads/2024/11/luontoaskel_terveyteen-ohjelma_2022-2032_asiakirja.pdf |
| **Päijät-Häme** | Jatkuvasti päivitettävä kaupunkiseutusuunnitelman ja rakennemallin toimenpidetaulukko | Päijät-Häme county | https://paijat-hame.fi/wp-content/uploads/2023/05/20230524_Jatkuvasti_paivitettava_KSS.pdf |
| **Päijät-Häme** | Lahden kestävän energian ja ilmastonmuutoksen toimenpidesuunnitelma vuoteen 2030 | City of Lahti | https://www.lahti.fi/tiedostot/lahden-kestavan-energian-ja-ilmastonmuutoksen-toimenpidesuunnitelma-2030-secap/ |
| **Päijät-Häme** | Kestävän kaupunkiliikkumisen ohjelma 2021-2025 | City of Lahti | https://www.lahti.fi/tiedostot/kestavan-kaupunkiliikkumisen-ohjelma-sump-2021-2025-pdf/ |
| **Malta** | A National Health Systems Strategy for Malta 2023 – 2030 | Ministry for Health and Active Ageing (2022) | https://health.gov.mt/wp-content/uploads/2023/04/A_National_Health_Systems_Strategy_for_Malta_2023_-_2030_Investing_Successfully_for_a_Healthy_Future_EN.pdf |
| **Malta** | Action Plan Addressing Escape From Confinement of Invasive Alien Species (IAS) of Union Concern | Ministry for the Environment, Climate Change and Planning (2022) | https://era.org.mt/wp-content/uploads/2020/06/Action-Plan-Addressing-Escape-from-Confinement-of-IAS-of-Union-Concern.pdf |
| **Malta** | Conservation objectives and measures for Malta’s marine Natura 2000 sites | Environment and Resource Authority (2023) | https://era.org.mt/wp-content/uploads/2023/02/MPAs-Conservation-Objectives-and-Measures_final_Feb2023.pdf |
| **Malta** | Green Paper on Greening Buildings in Malta | Ministry for the Environment, Climate Change and Planning (2020) | https://era.org.mt/green-paper-on-greening-buildings-in-malta-initiatives-for-green-walls-and-roofs-for-residential-commercial-and-industrial-buildings/ |
| **Malta** | Malta's Sustainable Development Strategy for 2050 | Ministry for the Environment, Energy, and Regeneration of the Grand Harbor (2024) | https://sustainabledevelopment.gov.mt/wp-content/uploads/2024/06/Maltas-Sustainable-Development-Strategy-for-2050-1.pdf |
| **Malta** | A National Health Systems Strategy for Malta 2023 – 2030 | Ministry for Health and Active Ageing (2022) | https://health.gov.mt/wp-content/uploads/2023/04/A_National_Health_Systems_Strategy_for_Malta_2023_-_2030_Investing_Successfully_for_a_Healthy_Future_EN.pdf |
| **Malta** | Action Plan Addressing Escape From Confinement of Invasive Alien Species (IAS) of Union Concern | Ministry for the Environment, Climate Change and Planning (2022) | https://era.org.mt/wp-content/uploads/2020/06/Action-Plan-Addressing-Escape-from-Confinement-of-IAS-of-Union-Concern.pdf |
| **Malta** | Conservation objectives and measures for Malta’s marine Natura 2000 sites | Environment and Resource Authority (2023) | https://era.org.mt/wp-content/uploads/2023/02/MPAs-Conservation-Objectives-and-Measures_final_Feb2023.pdf |
| **Malta** | Green Paper on Greening Buildings in Malta | Ministry for the Environment, Climate Change and Planning (2020) | https://era.org.mt/green-paper-on-greening-buildings-in-malta-initiatives-for-green-walls-and-roofs-for-residential-commercial-and-industrial-buildings/ |
| **Malta** | Malta's Sustainable Development Strategy for 2050 | Ministry for the Environment, Energy, and Regeneration of the Grand Harbor (2024) | https://sustainabledevelopment.gov.mt/wp-content/uploads/2024/06/Maltas-Sustainable-Development-Strategy-for-2050-1.pdf |
| **Malta** | National Climate Change Adaptation Strategy | Ministry for Resources and Rural Affairs (2012) | https://climate-laws.org/documents/national-climate-change-adaptation-strategy_e9fb?id=national-climate-change-adaptation-strategy_5bf12 |
| **Malta** | National Air Pollution Control Program | Environment and Resources Authority (2020) | https://era.org.mt/wp-content/uploads/2021/04/NAPCP.pdf |
| **Malta** | National Biodiversity Strategy and Action Plan to 2030 (draft) | Environment and Resources Authority (2023) | https://era.org.mt/wp-content/uploads/2023/02/NBSAP-public-consultation-draft-19.01.23.pdf |
| **Malta** | National Strategy For Preventing and Mitigating the Impact of Invasive Alien Species (IAS) in the Maltese Islands | Environment and Resources Authority & Ministry for the Environment, Climate Change and Planning (2020) | https://era.org.mt/wp-content/uploads/2020/06/National-Strategy-for-IAS-Measures-for-Implementation.pdf |
| **Malta** | National Strategy for the Environment 2050 | Ministry for the Environment, Energy and Enterprise (2022) | https://era.org.mt/nse2050/ |
| **Malta** | National Transport Master Plan 2025 | Transport Malta (2016) | https://transportmalta.wetransfer.com/downloads/c0ed2f41cbdb8b47a22ef7c932bbebaf20170327084338/cfb89a |
| **Malta** | National Transport Strategy 2050 | Transport Malta (2016) | https://transportmalta.wetransfer.com/downloads/02a871c2a36e859b751f40dd405a4b4a20161202212452/4df52a |
| **Malta** | Noise Action Plan Malta Agglomeration (2019 – 2024) | Environment and Resources Authority (2023) | https://era.org.mt/wp-content/uploads/2023/12/Noise-Action-Plan-Agglomeration-Interactive.pdf |

## **Table 2. Evaluation Criteria for City Transformations Assessment**

| **Overarching Goal** | **Evaluation Criteria** | **Benchmarks / Reference Frameworks** |
| --- | --- | --- |
| **1. Mitigation** | Assessment of the city’s overarching mitigation goal and specific plans across each mitigation strategy (M1–M7). High performance in one area can compensate for lower progress in others. | - 55% GHG reduction by 2030 vs. 1990 levels (EU Green Deal 2019; European Climate Law 2021) - Targets for decarbonization across key areas: energy production (M1), buildings (M2), transport (M3), etc. |
| **2. Adaptation** | Assessment of city plans based on attention to key local vulnerabilities, resilience of societal and governance structures, and use of NBS to mitigate natural disasters (flood protection, temperature moderation). | - EU Climate Adaptation Strategy (2021) - Nature Restoration Regulation (2024) |
| **3. Biodiversity** | Extent and quality of nature restoration and ecosystem protection in city plans. | - EU Biodiversity Strategy (2020): reverse ecosystem degradation by 2030 - Nature Restoration Regulation (2024): binding targets for ecosystem restoration - EU Zero Pollution Action Plan (2021): reduce pollution to levels not harmful to ecosystems |
| **4. Health and Well-being** | Assessment adapted to local context, based on: - Accessibility to green spaces - Provision of recreational space - Reductions in pollution harmful to health. | - WHO Urban Green Spaces (2017): access to green spaces ≥0.5–1 ha within 300m of homes - WHO GAPPA (2018): global action plan for physical activity - EU Zero Pollution Action Plan (2021): reduce air, water, soil, noise pollution to levels not harmful to human health by 2030 and 2050 vision |

#

## **Table 3. Key Policy References Table**

| **Policy / Strategy** | **Document Info** | **Link** |
| --- | --- | --- |
| **EU Green Deal (2019)** | Communication From The Commission: The European Green Deal. European Commission. Document 52019DC0640. | https://eur-lex.europa.eu/legal-content/EN/TXT/?uri=CELEX%3A52019DC0640 |
| **European Climate Law (2021)** | Regulation (EU) 2021/1119 of the European Parliament and of the Council of 30 June 2021 establishing the framework for achieving climate neutrality and amending Regulations (EC) No 401/2009 and (EU) 2018/1999 (‘European Climate Law’). Official Journal of the European Union L 243/1. | https://eur-lex.europa.eu/legal-content/EN/TXT/?uri=CELEX:32021R1119 |
| **EU Climate Adaptation Strategy (2021)** | Forging a climate-resilient Europe - the new EU Strategy on Adaptation to Climate Change. European Commission. Document 52021DC0082. | https://eur-lex.europa.eu/legal-content/EN/TXT/?uri=COM:2021:82:FIN |
| **EU Biodiversity Strategy (2020)** | EU Biodiversity Strategy for 2030. European Commission. Document 52020DC0380. | https://eur-lex.europa.eu/legal-content/EN/TXT/?uri=celex%3A52020DC0380 |
| **Nature Restoration Law (2024)** | Regulation (EU) 2024/1991 of the European Parliament and of the Council of 24 June 2024 on nature restoration and amending Regulation (EU) 2022/869 (Text with EEA relevance). Official Journal of the European Union. Document 32024R1991. | http://data.europa.eu/eli/reg/2024/1991/oj |
| **WHO Urban Green Spaces (2017)** | Urban green spaces: a brief for action. World Health Organization. Regional Office for Europe. ISBN: 9789289052498. | https://iris.who.int/bitstream/handle/10665/344116/9789289052498-eng.pdf?sequence=1 |
| **WHO Urban Green Spaces (2017a)** | Urban green space interventions and health: A review of impacts and effectiveness. Full report. World Health Organization. | https://cdn.who.int/media/docs/librariesprovider2/euro-health-topics/environment/urban-green-space-intervention.pdf?sfvrsn=a2e135f3_1&download=true |
| **WHO GAPPA (2018)** | Global action plan on physical activity 2018–2030: more active people for a healthier world. World Health Organization. ISBN: 9789241514187. | https://iris.who.int/bitstream/handle/10665/272722/9789241514187-eng.pdf?sequence=1 |
| **EU Zero Pollution Action Plan (2021)** | Towards a Zero Pollution for Air, Water and Soil (and annexes). European Commission. Document 52021DC0400. | https://eur-lex.europa.eu/legal-content/EN/TXT/?uri=CELEX%3A52021DC0400&qid=1623311742827 |
